# Supplementary material
Source: publisher figshare collection journal article supplement (https://karger.figshare.com/articles/dataset/_/4028862)
Supplement: Supplementary file 2 [file 1]

**Supplementary Table 3: Individual results of miR-371a-3p levels in hydrocele fluid**

| <b>case Id</b> | <b>age (years)</b> | <b>CS</b> | <b>CVB (RQ)</b> | <b>TVB (RQ)</b> | <b>HY (RQ)</b> |
|----------------|--------------------|-----------|-----------------|-----------------|----------------|
| 25             | 45                 | 1         | 1,062.4         | 73,131.8        | 707,459.9      |
| 26             | 35                 | 1         | 2,391.3         | 151,149.1       | 20,033.1       |
| 28             | 55                 | 1         | 10,754.2        | 5,913,475.3     | 3,604,889.4    |
| 43             | 52                 | 1         | 39.1            | 1,880.8         | 39,827.8       |
| 50             | 33                 | 1         | 2,346.9         | 208,113.8       | 17,529.8       |
| 64             | 26                 | 1         | 1,860.0         | 34,846.7        | 1,893.8        |
| 89             | 51                 | 1         | 2.7             | 1,022.0         | 56.2           |
| 6              | 27                 | 2b        | 13,043.9        | n.a.            | 10,999,951.7   |
| 18             | 53                 | 2a        | 7,256.0         | 663,159.0       | 2,632,363.8    |
| 125            | 86                 | C         | n.d.            | n.a.            | n.d.           |
| 128            | 46                 | C         | n.a.            | n.a.            | n.d.           |
| 131            | 75                 | C         | n.d.            | n.a.            | n.d.           |

C: control. CS: clinical stage. n.a. not available. n.d.: not detectable. CVB: cubital vein blood. TVB: testicular vein blood. RQ: relative quantity. HY: hydrocele fluid.
