# Supplementary material
Source: publisher figshare collection journal article supplement (https://karger.figshare.com/articles/dataset/_/4028862)
Supplement: Supplementary file 3 [file 1]

**Supplementary Table 2: Individual results of miR-371a-3p measurements in CVB and TVB of controls.**

| <b>case Id</b> | <b>age (years)</b> | <b>diagnosis</b>        | <b>CVB (RQ)</b> | <b>TVB (RQ)</b> |
|----------------|--------------------|-------------------------|-----------------|-----------------|
| 12             | 42                 | spermatocele            | 0.000           | 0.000           |
| 32             | 56                 | spermatocele            | 0.037           | 0.000           |
| 33             | 51                 | Posttraumatic fibrosis  | 0.000           | 28.737          |
| 34             | 50                 | Epididymo-orchitis      | 0.000           | 7.769           |
| 57             | 18                 | varicocele              | 0.000           | 0.000           |
| 59             | 52                 | spermatocele            | 0.000           | 0.000           |
| 63             | 48                 | Benign epididymal tumor | 0.000           | 0.000           |
| 79             | 36                 | varicocele              | 9.259           | 0.758           |
| 90             | 41                 | spermatocele            | 0.000           | 1.693           |
| 96             | 40                 | epididymitis            | 0.000           | 3.652           |

CVB: cubital vein blood. TVB: testicular vein blood. RQ: relative quantity.
