# Supplementary material
Source: publisher figshare collection journal article supplement (https://karger.figshare.com/articles/dataset/_/4028862)
Supplement: Supplementary file 4 [file 1]

**Supplementary Table 1:** Clinical details of patients and relative miR-371a-3p expression in CVB and TVB.

| case<br>Id | age<br>(years) | histology<br>S/NS | percentage<br>of teratoma | tumor size<br>(mm) | testis length<br>(mm) | pT<br>stage | localization<br>right/left | CS | CVB (RQ)<br>pre-op | TVB (RQ)      | CVB (RQ)<br>post-op |
|------------|----------------|-------------------|---------------------------|--------------------|-----------------------|-------------|----------------------------|----|--------------------|---------------|---------------------|
| 14         | 35             | NS                | 95%                       | 35                 | 40                    | pT1         | ri                         | 1  | 0.000              | 669.549       | 0.000               |
| 15         | 26             | S                 | 0                         | 33                 | 45                    | pT1         | ri                         | 1  | 771.729            | 2,901,834.938 | 0.022               |
| 17         | 28             | NS                | 0                         | 9                  | 43                    | pT1         | ri                         | 1  | 554.700            | 2,506.816     | n.m.                |
| 18         | 48             | S                 | 0                         | 15                 | 45                    | pT1         | ri                         | 1  | 492.184            | 2,094.250     | 3.593               |
| 19         | 41             | S                 | 0                         | 25                 | 55                    | pT1         | ri                         | 1  | 1,765.523          | 189,358.699   | 0.030               |
| 20         | 41             | S                 | 0                         | 55                 | 55                    | pT2         | ri                         | 1  | 1,162.388          | 2,607,999.372 | n.m.                |
| 21         | 48             | S                 | 0                         | 10                 | 50                    | pT1         | ri                         | 1  | 186.708            | 1,540.696     | 0.000               |
| 22         | 22             | NS                | 100%                      | 9                  | 50                    | pT1         | le                         | 1  | 0.113              | 695.662       | 0.000               |
| 23         | 52             | S                 | 0                         | 15                 | 32                    | pT2         | ri                         | 1  | 32.767             | 5,268.124     | 0.000               |
| 25         | 45             | S                 | 0                         | 37                 | 55                    | pT1         | ri                         | 1  | 1,062.353          | 73,131.747    | 0.293               |
| 26         | 35             | NS                | 0                         | 54                 | 55                    | pT2         | ri                         | 1  | 2,391.268          | 151,149.076   | n.m.                |
| 27         | 37             | S                 | 0                         | 9                  | 43                    | pT1         | ri                         | 1  | 0.542              | 5,677.671     | 0.000               |
| 28         | 55             | NS                | 0                         | 9                  | 70                    | pT2         | le                         | 1  | 10,754.019         | 5,913,475.246 | 3.577               |
| 29         | 32             | S                 | 0                         | 38                 | 50                    | pT3         | le                         | 1  | 2,572.260          | 67,437.259    | n.m.                |
| 30         | 37             | S                 | 0                         | 9                  | 38                    | pT1         | ri                         | 1  | 0.170              | 579.579       | 1.130               |
| 31         | 50             | S                 | 0                         | 30                 | 54                    | pT2         | ri                         | 1  | 0.672              | 36.965        | 0.000               |
| 32         | 31             | S                 | 0                         | 28                 | 50                    | pT1         | le                         | 1  | 33.209             | 1,561,473.360 | 0.013               |
| 33         | 54             | S                 | 0                         | 13                 | 35                    | pT1         | le                         | 1  | 13.014             | 8,031.733     | 0.000               |
| 34         | 18             | NS                | 80%                       | 33                 | 55                    | pT1         | le                         | 1  | 160.518            | 5,145.532     | 6.255               |
| 36         | 49             | S                 | 0                         | 13                 | 40                    | pT2         | le                         | 1  | 174.149            | 8,164.584     | 0.062               |
| 37         | 36             | S                 | 0                         | 15                 | 50                    | pT1         | ri                         | 1  | 200.198            | 89,097.046    | n.m.                |
| 38         | 33             | S                 | 0                         | 4                  | 35                    | pT1         | ri                         | 1  | 0.379              | 5,797.373     | 0.000               |
| 39         | 45             | S                 | 0                         | 40                 | 65                    | pT2         | le                         | 1  | 14,219.408         | 5,457,765.911 | n.m.                |
| 41         | 41             | NS                | 60%                       | 50                 | 50                    | pT1         | le                         | 1  | 1,337.139          | 189,940.808   | 0.000               |
| 42         | 32             | NS                | 80%                       | 45                 | 55                    | pT1         | le                         | 1  | 9.545              | 4,816.550     | 0.000               |
| 43         | 52             | S                 | 0                         | 9                  | 35                    | pT1         | le                         | 1  | 39.062             | 1,880.759     | 0.000               |
| 44         | 31             | S                 | 0                         | 45                 | 50                    | pT2         | ri                         | 1  | 3,916.182          | 558,048.824   | 0.000               |
| 45         | 34             | NS                | 100%                      | 11                 | 35                    | pT1         | ri                         | 1  | 31.333             | 225,293.666   | n.m.                |
| 47         | 46             | S                 | 0                         | 13                 | 33                    | pT1         | ri                         | 1  | 33.220             | 2,823.738     | 0.000               |
| 50         | 33             | S                 | 0                         | 40                 | 65                    | pT1         | ri                         | 1  | 2,346.870          | 208,113.811   | n.m.                |
| 51         | 30             | S                 | 0                         | 28                 | 42                    | pT2         | ri                         | 1  | 0.000              | 151,462.180   | 0.000               |
| 53         | 31             | NS                | 60%                       | 30                 | 40                    | pT2         | le                         | 1  | 3,187.045          | 420,303.413   | 1.780               |
| 54         | 31             | S                 | 0                         | 35                 | 55                    | pT2         | le                         | 1  | 1,421.810          | 29,555.272    | 0.000               |
| 55         | 25             | S                 | 0                         | 18                 | 38                    | pT1         | le                         | 1  | 11.377             | 9,126.662     | 4.421               |

|    |    |    |      |    |    |     |    |    |            |               |       |
|----|----|----|------|----|----|-----|----|----|------------|---------------|-------|
| 56 | 47 | S  | 0    | 70 | 45 | pT2 | le | 1  | 6,455.190  | 578,028.342   | 6.840 |
| 57 | 35 | S  | 0    | 14 | 55 | pT1 | ri | 1  | 148.968    | 50,024.153    | n.m.  |
| 58 | 41 | S  | 0    | 12 | 40 | pT2 | le | 1  | 375.604    | 121,497.565   | n.m.  |
| 59 | 43 | S  | 0    | 20 | 55 | pT2 | ri | 1  | 751.362    | 15,619.596    | 0.000 |
| 60 | 45 | S  | 0    | 65 | 70 | pT2 | le | 1  | 1,696.171  | 36,117.169    | 2.216 |
| 61 | 41 | S  | 0    | 19 | 50 | pT1 | ri | 1  | 58.824     | 236,977.188   | n.m.  |
| 62 | 18 | NS | 40%  | 60 | 60 | pT2 | le | 1  | 26,865.548 | 3,192,757.666 | n.m.  |
| 63 | 38 | NS | 0    | 20 | 45 | pT1 | le | 1  | 161.033    | 2,634.268     | 0.000 |
| 64 | 26 | NS | 0    | 17 | 55 | pT2 | le | 1  | 1,859.997  | 34,846.722    | 0.000 |
| 84 | 48 | S  | 0    | 15 | 40 | pT1 | ri | 1  | 29.599     | 1,978.289     | 0.845 |
| 85 | 33 | S  | 0    | 36 | 52 | pT2 | ri | 1  | 2,744.063  | 159,439.236   | n.m.  |
| 86 | 23 | NS | 0    | 24 | 55 | pT2 | ri | 1  | 1,310.144  | 295,863.813   | n.m.  |
| 87 | 46 | S  | 0    | 20 | 45 | pT1 | ri | 1  | 618.618    | 7,776.402     | 0.000 |
| 88 | 44 | S  | 0    | 40 | 55 | pT2 | ri | 1  | 338.361    | 5,757.536     | n.m.  |
| 89 | 51 | S  | 0    | 19 | 50 | pT1 | ri | 1  | 2.682      | 1,021.958     | n.m.  |
| 90 | 33 | S  | 0    | 21 | 38 | pT1 | ri | 1  | 93.625     | 9,529.994     | n.m.  |
| 91 | 49 | S  | 0    | 50 | 52 | pT2 | le | 1  | 1,632.434  | 2,035,125.560 | n.m.  |
| 3  | 20 | NS | 0    | 28 | 50 | pT2 | ri | 2b | 6,541.110  | 720,353.011   | n.m.  |
| 5  | 26 | NS | 0    | 13 | 52 | pT2 | ri | 2a | 431.569    | 9,396.291     | n.m.  |
| 7  | 31 | NS | 0    | 35 | 40 | pT2 | le | 2c | 10,735.459 | 61,398.650    | n.m.  |
| 8  | 31 | S  | 0    | 65 | 65 | pT2 | le | 2b | 10,923.638 | 275,641.593   | n.m.  |
| 9  | 47 | NS | 30%  | 80 | 80 | pT2 | ri | 2a | 23,165.973 | 1,026,819.036 | n.m.  |
| 10 | 32 | S  | 0    | 25 | 45 | pT1 | ri | 2b | 20.331     | 52.810        | n.m.  |
| 11 | 41 | S  | 0    | 21 | 32 | pT2 | ri | 2a | 89.679     | 43,094.204    | n.m.  |
| 12 | 50 | S  | 0    | 20 | 55 | pT2 | le | 2a | 359.082    | 12,488.574    | n.m.  |
| 15 | 38 | NS | 100% | 15 | 40 | pT1 | ri | 2a | 6.894      | 15,602.878    | n.m.  |
| 16 | 46 | S  | 0    | 60 | 65 | pT2 | le | 2a | 17,209.141 | 3,476,888.376 | n.m.  |
| 18 | 53 | S  | 0    | 75 | 75 | pT2 | le | 2a | 7,255.988  | 663,159.012   | n.m.  |
| 31 | 46 | S  | 0    | 45 | 60 | pT2 | le | 2a | 1,914.112  | 67,292.799    | n.m.  |
| 4  | 48 | S  | 0    | 30 | 50 | pT2 | le | 3  | 1,776.780  | 85,778.392    | n.m.  |

S: seminoma. NS: non-seminoma. CS: clinical stage. pT: pathological tumor. pre-op: preoperative. post-op: postoperative. CVB: cubital vein blood. TVB: testicular vein blood. RQ: relative quantity. n.m.: not measured.
